# Supplementary material for: Multi-method approach for analysis of road dust particles: elemental ratios, SP-ICP-TOF-MS, and TEM
Source: Royal Society of Chemistry journal article supplement (doi:10.1039/d2en00409g), 2022-01-01
Supplement: d2en00409g1.pdf [file d2en00409g1.pdf]

**Supporting Information for**  
**Multi method approach for analysis of road dust particles: elemental ratios,**  
**SP-ICP-TOF-MS, and TEM**

Feiyun Tou<sup>1</sup>, Md. Mahmudun Nabi<sup>2</sup>, Jingjing Wang<sup>2</sup>, Mahdi Erfani<sup>3</sup>, Erfan Goharian<sup>3</sup>, Jing Chen,<sup>4</sup> Yi Yang<sup>1\*</sup>,  
and Mohammed Baalousha<sup>2\*</sup>

<sup>1</sup> *Key Laboratory of Geographic Information Science (Ministry of Education), School of Geographical Sciences, East China Normal University, 500 Dongchuan Road, Shanghai 200241, China*

<sup>2</sup> *Center for Environmental Nanoscience and Risk, Department of Environmental Health Sciences, Arnold School of Public Health, University of South Carolina, Columbia, South Carolina, 29201, United State*

<sup>3</sup> *Department of Civil and Environmental Engineering, University of South Carolina, SC 29208, USA*

<sup>4</sup> *State Key Laboratory of Estuarine and Coastal Research, Yangtze Delta Estuarine Wetland Ecosystem Observation and Research Station, Ministry of Education & Shanghai, East China Normal University, 3663 North Zhongshan Road, Shanghai 200062, China*

**\* Corresponding Author**

**Yi Yang** - *Key Laboratory of Geographic Information Science (Ministry of Education); School of Geographical Sciences, East China Normal University, 500 Dongchuan Road, Shanghai 200241, China; Phone: +86-21-54341196; Email: yyang@geo.ecnu.edu.cn*

**Mohammed Baalousha** - *Center for Environmental Nanoscience and Risk, Department of Environmental Health Sciences, Arnold School of Public Health, University of South Carolina, Columbia, South Carolina, 29201, United State; Phone: +1-803-777-7177; Email: mbaalous@mailbox.sc.edu*

Table S1 Parameters of ICP-MS and SP-ICP-TOF-MS.

| Instrument Parameter    | ICP-MS          | SP-ICP-TOF-MS             |
|-------------------------|-----------------|---------------------------|
| Nebulizer Gas Flow      | 0.85 to 1 L/min | 1.10 to 1.14 L/min        |
| Auxiliary Gas Flow      | 1.02 L/min      | 0.8 L/min                 |
| Plasma Gas Flow         | 16 L/min        | 14 L/min                  |
| ICP RF Power            | 1600 W          | 1550 W                    |
| Analog Stage Voltage    | -1600 V         | --                        |
| Pulse Stage Voltage     | 1600 V          | --                        |
| Discriminator Threshold | 12              | --                        |
| Deflector Voltage       | -9.5 V          | --                        |
| Dwell time              | 50 ms           | --                        |
| Sample Flow Rate        | 0.3 mL/min      | 0.4 mL/min                |
| Collision Cell Gas      | --              | Helium with 4.5% Hydrogen |
| Collision Cell Gas Flow | --              | 5.0 mL/min                |
| Integration Time        | --              | 2 ms                      |
| Transport Efficiency    | --              | 5-7%                      |
| Detected mass range     | --              | 14-275 amu                |
| TOF repetition rate     | --              | 33 kHz                    |
| TOF time resolution     | --              | 30 $\mu$ s                |

Each sediment sample was from a sediment column at a depth of about 2 m, and these columns were taken from the coastal area of Shanghai. Shanghai is a part of the alluvial plain of the Yangtze River Delta, and the offshore sediments are also formed by the impact of the Yangtze River sediment, which can represent the background of the urban surface in Shanghai. Based on the underwater deposition rate of the Yangtze River Delta (around 1-4 cm per year<sup>1, 2</sup>), these core sediment samples can be dated for about 100 years ago. The metal concentrations and elemental ratios of 28 reference sediments are shown in Table S2 and Table S3, respectively.

Table S2 Metal concentrations of reference sediments in the sampling area.

| Sample | Depth (m) | Al (mg/kg) | Ti (mg/kg) | Fe (mg/kg) | Sn (mg/kg) | Pb (mg/kg) | Ce (mg/kg) | La (mg/kg) | Nb (mg/kg) | W (mg/kg) | U (mg/kg) |
|--------|-----------|------------|------------|------------|------------|------------|------------|------------|------------|-----------|-----------|
| S1     | 2.25      | 54000.0    | 5025       | 31780      | 3.12       | 21.9       | 97.7       | 54.6       | 16.8       | 2.39      | 2.48      |
| S2     | 2         | 43623.5    | 6866       | 30310      | 6.62       | 19.4       | 79.7       | 42.8       | 13.7       | 1.27      | 1.53      |
| S3     | 2         | 59294.1    | 4431       | 31220      | 3.34       | 25.7       | 66.9       | 36.4       | 14.6       | 1.66      | 2.02      |
| S4     | 2         | 66705.9    | 6118       | 40460      | 4.19       | 25.9       | 116        | 63.5       | 22.5       | 1.94      | 2.97      |
| S5     | 1.9       | 58764.7    | 4017       | 30030      | 3.58       | 18.5       | 64.3       | 34.1       | 13.5       | 1.32      | 1.75      |
| S6     | 2.1       | 42988.2    | 6681       | 32130      | 2.93       | 17.1       | 125        | 67.6       | 18.7       | 1.32      | 2.09      |
| S7     | 2         | 50347.1    | 3408       | 23310      | 2.35       | 15.9       | 68         | 37.2       | 12.8       | 0.98      | 1.76      |
| S8     | 2         | 48282.4    | 4844       | 29050      | 2.76       | 20.5       | 68.5       | 36.4       | 13.5       | 1.43      | 1.58      |
| S9     | 1.9       | 48547.1    | 4425       | 26740      | 2.59       | 14.5       | 63.5       | 34.1       | 13.5       | 1.37      | 1.91      |
| S10    | 2         | 59823.5    | 4661       | 30870      | 3.11       | 25.2       | 74.2       | 40         | 15         | 1.79      | 2.37      |
| S11    | 2         | 63000.0    | 4780       | 33250      | 3.98       | 22.9       | 79.5       | 43.3       | 16.2       | 1.67      | 2.39      |
| S12    | 2         | 73058.8    | 4613       | 38640      | 3.24       | 25.6       | 80.7       | 43.3       | 16.4       | 1.92      | 2.54      |
| S13    | 2.2       | 52676.5    | 4497       | 27160      | 2.68       | 20.3       | 72.3       | 39         | 15.2       | 1.68      | 1.94      |
| S14    | 2.2       | 71470.6    | 4461       | 36190      | 3.48       | 21.5       | 77.5       | 40.9       | 16.9       | 1.75      | 2.36      |
| S15    | 2         | 78352.9    | 4767       | 43470      | 3.92       | 27.8       | 83.8       | 44.4       | 17.4       | 2.01      | 2.45      |
| S16    | 2.2       | 70411.8    | 4348       | 34790      | 3.46       | 21         | 79.9       | 42.1       | 16.3       | 1.8       | 2.24      |
| S17    | 2.1       | 82058.8    | 4794       | 44380      | 3.55       | 29.1       | 80         | 42         | 18.4       | 2.05      | 2.62      |
| S18    | 2.1       | 70941.2    | 4241       | 36120      | 3.73       | 24         | 77.4       | 40.7       | 15.3       | 1.69      | 2.13      |
| S19    | 2.1       | 77294.1    | 4572       | 39550      | 3.54       | 26.9       | 72.6       | 38.7       | 16.9       | 1.77      | 2.45      |
| S20    | 2.1       | 69882.4    | 4368       | 34650      | 3.44       | 20.9       | 68.5       | 36.6       | 15.6       | 1.72      | 2.25      |
| S21    | 2         | 76235.3    | 4588       | 41230      | 4.82       | 28.9       | 73.9       | 39.1       | 16.2       | 2.09      | 2.5       |
| S22    | 2.1       | 56647.1    | 4222       | 27790      | 3.54       | 19.9       | 78.4       | 41.8       | 15.5       | 1.52      | 2.18      |
| S23    | 2.1       | 80470.6    | 4699       | 43680      | 4.1        | 30.4       | 77.8       | 40.9       | 17.7       | 2.03      | 2.8       |
| S24    | 2.1       | 66705.9    | 4343       | 34020      | 3.55       | 24.1       | 72.1       | 38.4       | 15.8       | 1.58      | 2         |
| S25    | 2.1       | 80470.6    | 4583       | 44170      | 4.31       | 30.8       | 87.5       | 45.9       | 16.4       | 2.2       | 2.68      |
| S26    | 2.1       | 76764.7    | 4375       | 37730      | 3.44       | 24.2       | 96.9       | 51.9       | 15.6       | 1.82      | 2.18      |
| S27    | 2.1       | 51405.9    | 3935       | 28140      | 3.77       | 19.4       | 64.5       | 34.2       | 12.7       | 1.51      | 1.67      |
| S28    | 2         | 72529.4    | 4676       | 38640      | 3.82       | 26.6       | 77.8       | 41.7       | 16.5       | 2.02      | 2.49      |

Table S3 Elemental ratios in reference sediments in the sampling area.

|                          | Ti/Nb  | Ti/W     | Ti/Al       | Ti/Fe       | Ce/La     | W/Nb      | Pb/ Nb    | Sn/ Nb    | W/U       |
|--------------------------|--------|----------|-------------|-------------|-----------|-----------|-----------|-----------|-----------|
| Mean                     | 284±17 | 2629±374 | 0.070±0.013 | 0.133±0.020 | 1.87±0.02 | 0.11±0.01 | 1.46±0.22 | 0.21±0.03 | 0.78±0.09 |
| Minimum                  | 261    | 2083     | 0.057       | 0.104       | 1.83      | 0.09      | 0.91      | 0.16      | 0.56      |
| Maximum                  | 328    | 3478     | 0.100       | 0.167       | 1.91      | 0.13      | 1.88      | 0.27      | 0.96      |
| 1 <sup>st</sup> Quartile | 271    | 2379     | 0.060       | 0.116       | 1.85      | 0.10      | 1.29      | 0.19      | 0.72      |
| 3 <sup>rd</sup> Quartile | 297    | 2998     | 0.084       | 0.152       | 1.89      | 0.12      | 1.60      | 0.23      | 0.83      |
| Average crustal ratio    | 312    | 1950     | 0.049       | 0.111       | 2.1       | 0.16      | 1.42      | 0.18      | 0.77      |

Note: Crustal REEs values are those reported in the study by Rudnick et al.,<sup>3</sup> and the average crustal elemental ratios are calculated based on the upper crustal elemental concentrations reported in this study.

Table S4 Results of principle component analysis carried out for source apportionment of metals in sampling sites.

|                                      | PC1          | PC2           | PC3          | PC4          |
|--------------------------------------|--------------|---------------|--------------|--------------|
| Nd                                   | <b>0.984</b> |               |              |              |
| Tb                                   | <b>0.981</b> |               |              |              |
| Dy                                   | <b>0.980</b> |               |              |              |
| Sm                                   | <b>0.979</b> |               |              |              |
| Al                                   | <b>0.979</b> |               |              |              |
| Gd                                   | <b>0.976</b> |               |              |              |
| Ho                                   | <b>0.967</b> |               |              |              |
| Pr                                   | <b>0.966</b> |               |              |              |
| Tm                                   | <b>0.960</b> |               |              |              |
| Er                                   | <b>0.957</b> |               |              |              |
| Zr                                   | <b>0.953</b> |               |              |              |
| Yb                                   | <b>0.951</b> |               |              |              |
| Hf                                   | <b>0.950</b> |               |              |              |
| Lu                                   | <b>0.937</b> |               |              |              |
| Eu                                   | <b>0.929</b> |               |              |              |
| Nb                                   | <b>0.920</b> |               |              |              |
| Y                                    | <b>0.919</b> |               |              |              |
| Sc                                   | <b>0.890</b> |               |              |              |
| La                                   | <b>0.875</b> |               | 0.445        |              |
| Ta                                   | <b>0.845</b> |               |              | 0.443        |
| Th                                   | <b>0.822</b> |               |              | 0.376        |
| Ce                                   | <b>0.808</b> |               | 0.459        | 0.331        |
| Ga                                   | <b>0.807</b> |               | 0.572        |              |
| Ti                                   | <b>0.786</b> |               | 0.309        |              |
| Ag                                   | <b>0.741</b> |               | -0.343       | -0.542       |
| U                                    | <b>0.727</b> | 0.379         |              |              |
| Mg                                   | <b>0.628</b> | 0.602         | -0.417       |              |
| Ni                                   |              | <b>0.970</b>  |              |              |
| V                                    |              | <b>0.954</b>  |              |              |
| Fe                                   |              | <b>0.954</b>  |              |              |
| Co                                   |              | <b>0.953</b>  |              |              |
| Ge                                   | 0.333        | <b>0.926</b>  |              |              |
| Cu                                   |              | <b>0.916</b>  |              |              |
| Mn                                   |              | <b>0.869</b>  |              |              |
| Sr                                   | -0.339       | <b>0.860</b>  | 0.315        |              |
| Cr                                   | -0.541       | <b>0.806</b>  |              |              |
| Mo                                   | 0.445        | <b>0.714</b>  | 0.463        |              |
| Pt                                   |              | <b>-0.697</b> |              | 0.544        |
| Sn                                   |              |               | <b>0.934</b> |              |
| Zn                                   | 0.439        |               | <b>0.880</b> |              |
| Cd                                   | 0.426        |               | <b>0.858</b> |              |
| Pb                                   | -0.516       | 0.358         | <b>0.723</b> |              |
| Ba                                   | 0.380        | -0.483        | <b>0.695</b> |              |
| W                                    | 0.461        | 0.468         | <b>0.658</b> |              |
| Cs                                   |              | -0.444        |              | <b>0.845</b> |
| Rb                                   |              | -0.441        |              | <b>0.841</b> |
| Eigenvalues                          | 25.32        | 11.13         | 5.54         | 2.63         |
| Percentage of variance explained (%) | 51.2         | 22.3          | 14.0         | 7.4          |



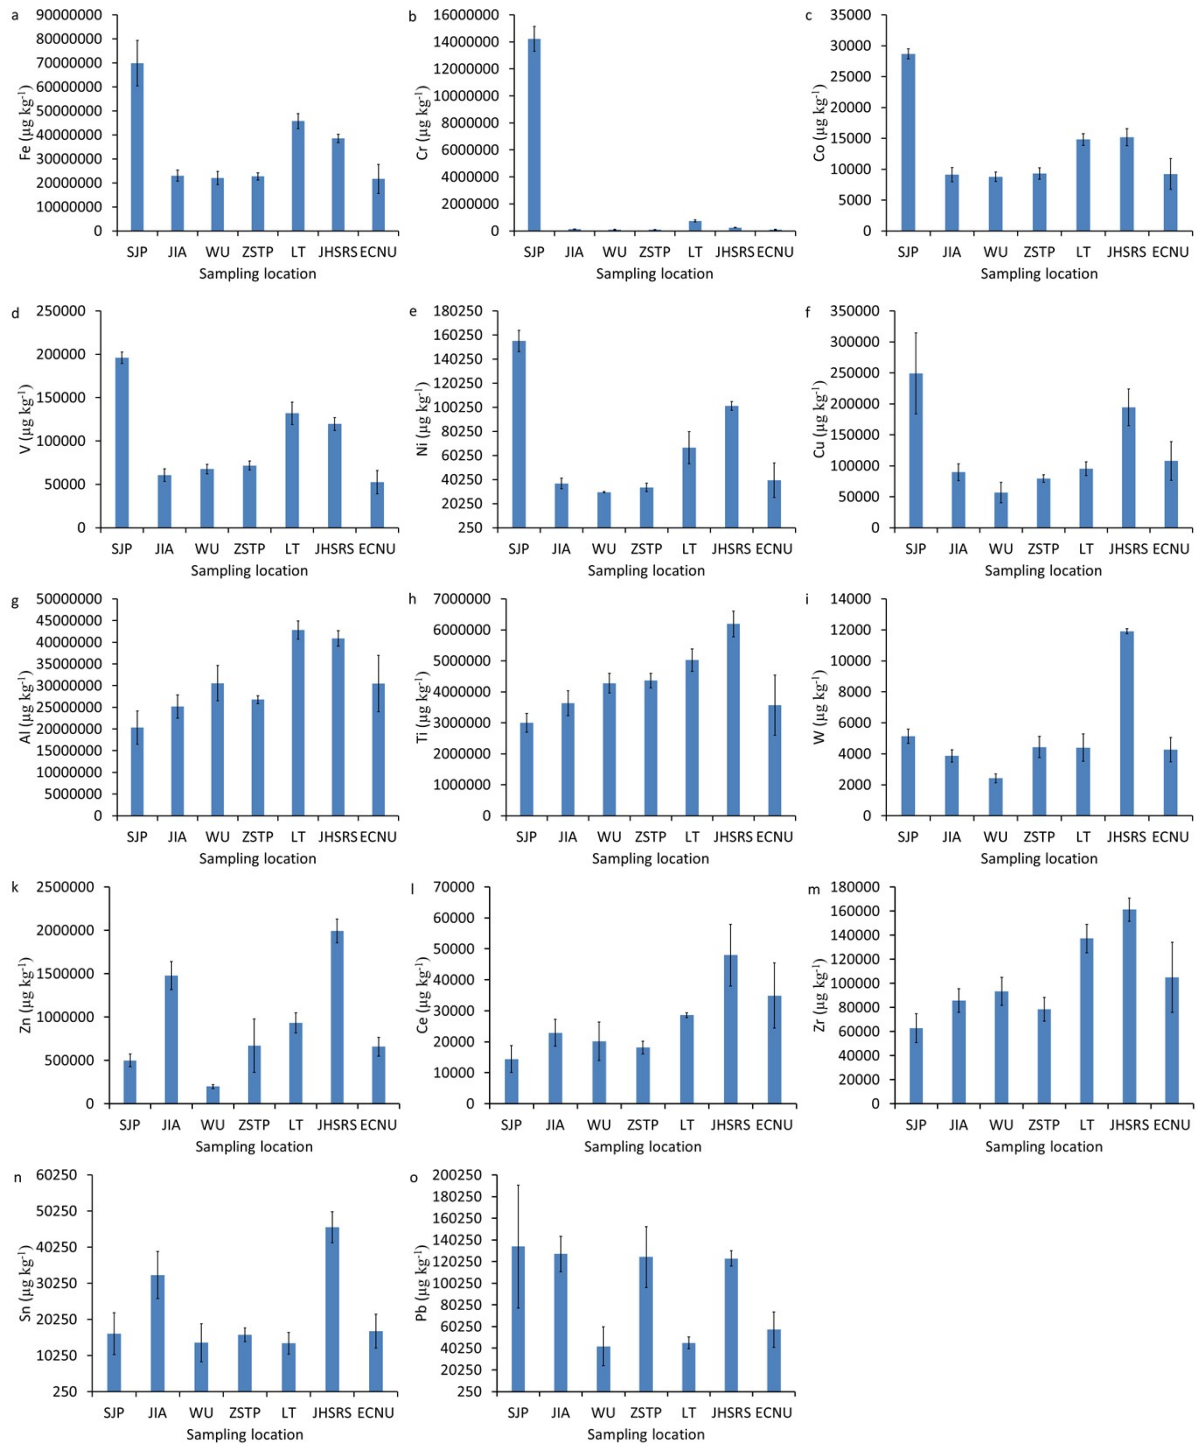

Fig. S1 Selected element concentrations (a) Fe, (b) Cr, (c) Co, (d) V, (e) Ni, (f) Cu, (g) Al, (h) Ti, (i) W, (k) Zn, (l) Ce, (m) Zr, (n) Sn, and (o) Pb.

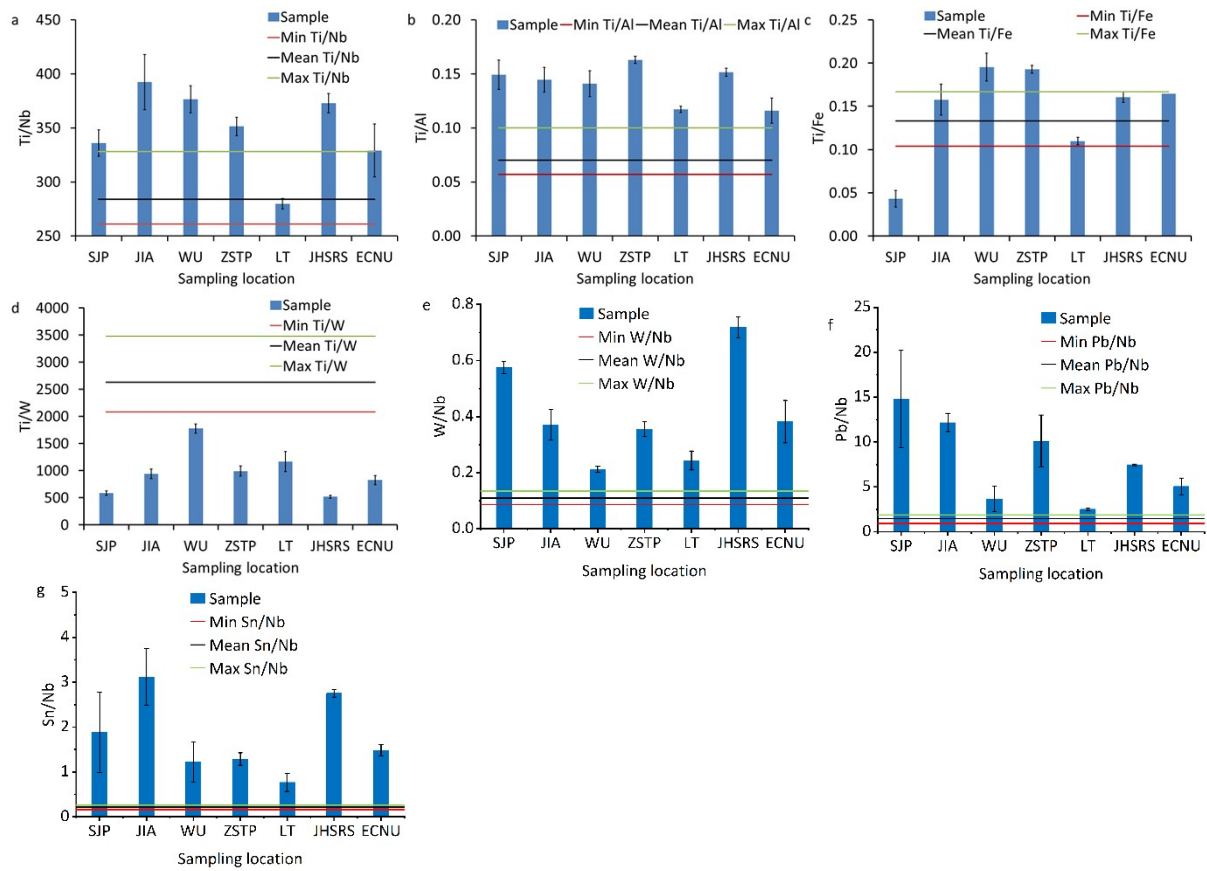

Fig. S2 Elemental ratios of (a) Ti/Nb, (b) Ti/Al, (c) Ti/Fe, (d) Ti/W, (e) W/Nb, (f) Pb/Nb, and (g) Sn/Nb in road dust samples. The line indicates the natural background crustal elemental ratio (minimum, mean, and maximum) of 28 sediments collected in the sampling area.

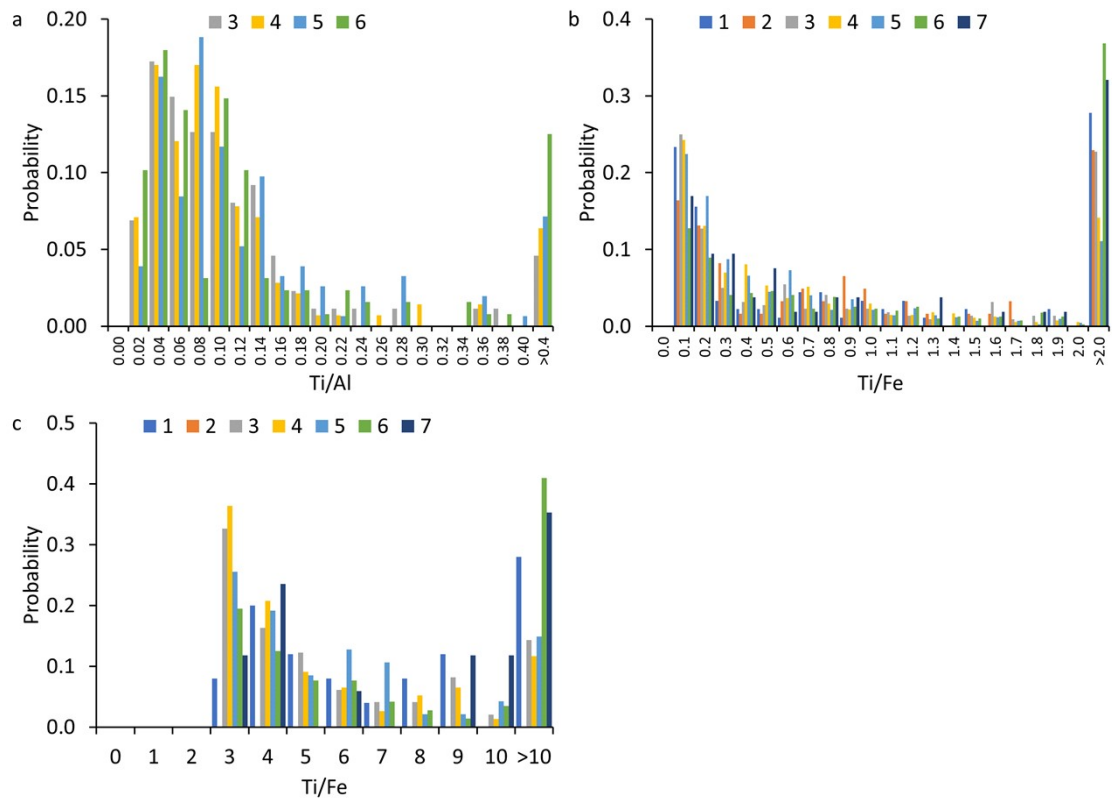

Fig. S3 Elemental ratios of (a) Ti/Al, and (b, and c) Ti/Fe on a single particle basis obtained by SP-ICP-TOF-MS. Samples 1, 2, and 7 contained few Ti- and Al-containing particles that were not sufficient to construct an elemental ratio distribution.



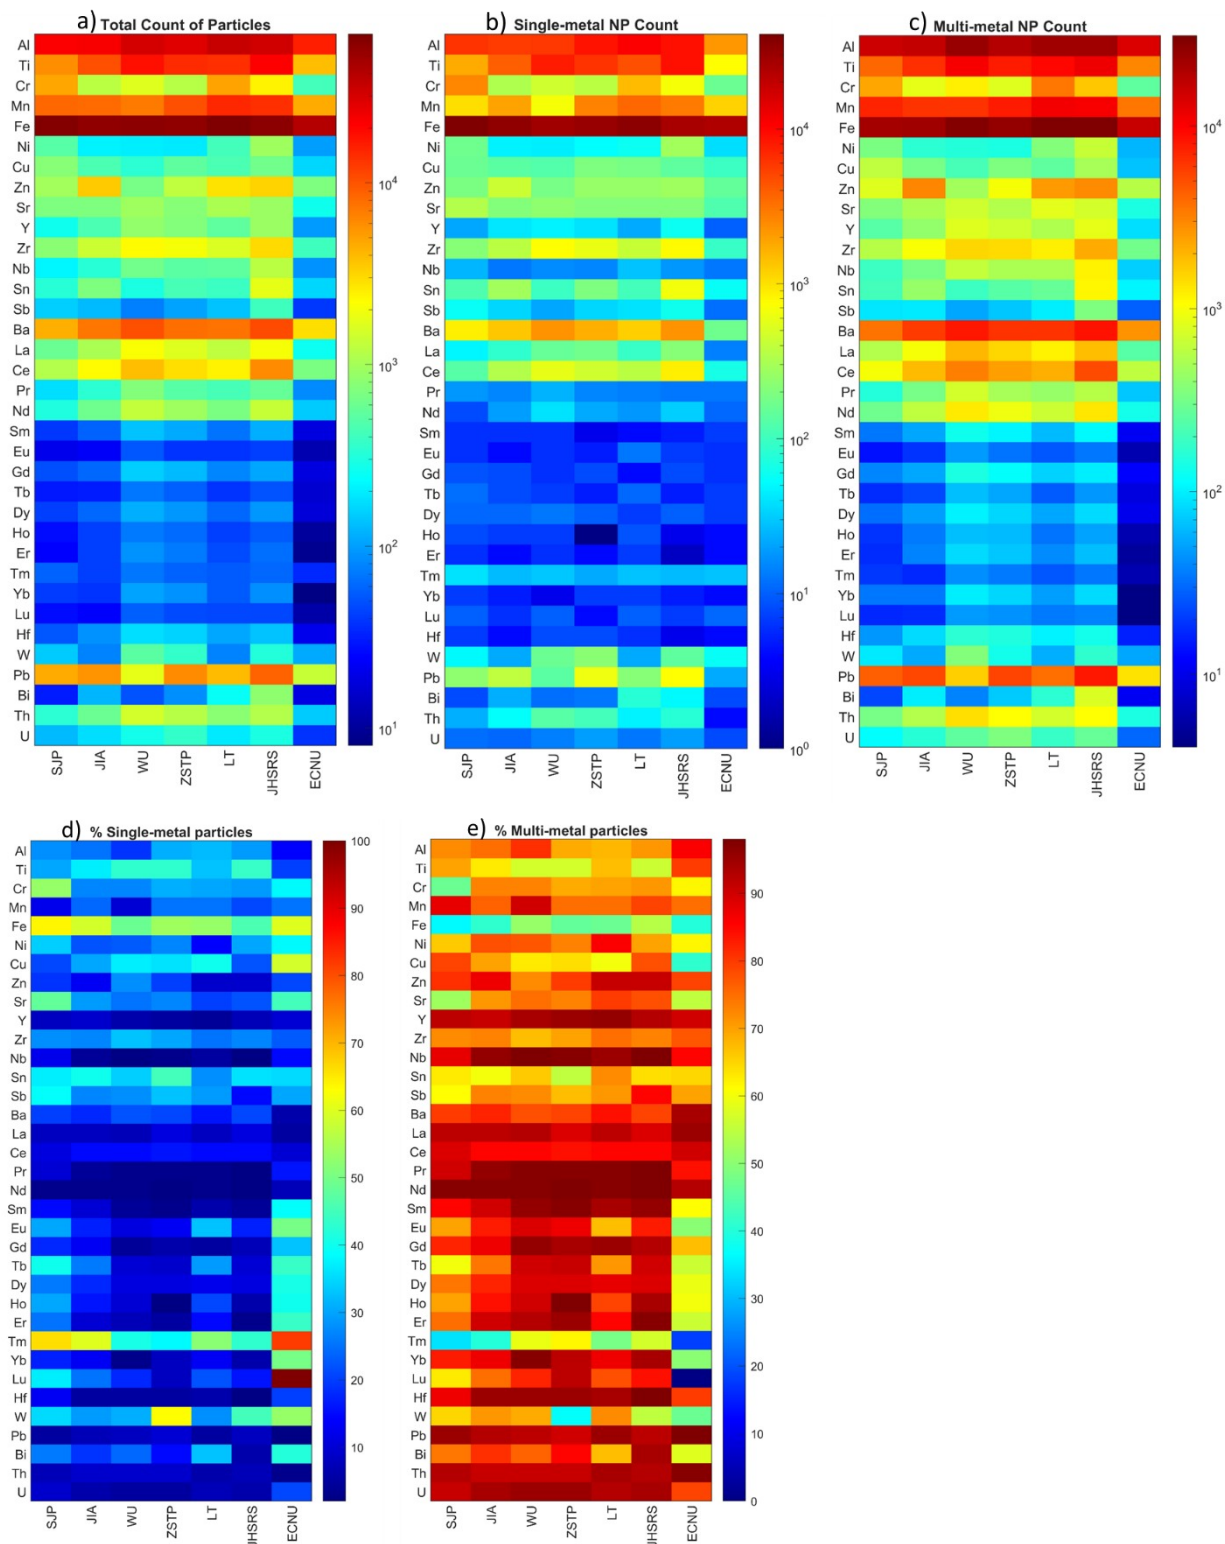

Fig. S4 Number of particles (particles/L) detected by SP-ICP-TOF-MS (a) total number of detected, (b) number of single metal particles, and (c) number of multi-metal particles, (d) percentage relative abundance of single metal particles, and (e) percentage relative abundance of multi-metal particles. All samples were analyzed in triplicates and the triplicate data were merged prior analysis.

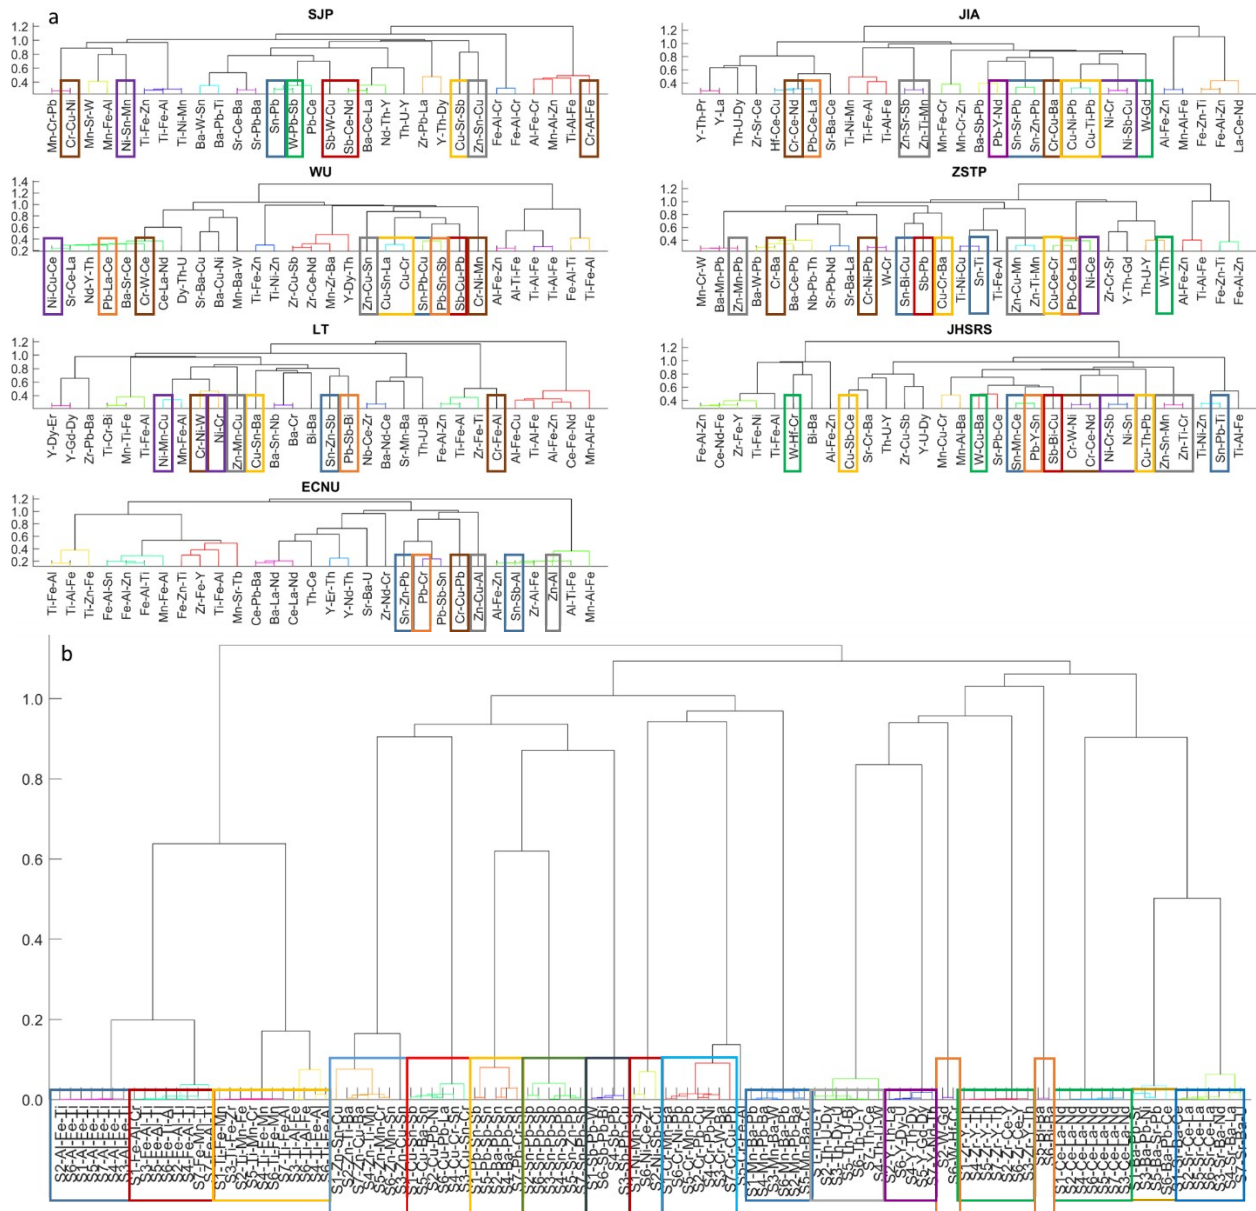

Fig. S5 Dendrogram of intra-sample hierarchical clustering analysis of road dust samples. First and second correlation distance cutoffs were sat at 0.5 and 0.2, respectively and maximum number of first stage clustering was sat at 30. Samples extracted using ultrapure water. Clusters are donated based on the frequency of element occurrence in particles in each cluster and does not necessarily infer mass fraction within particles.

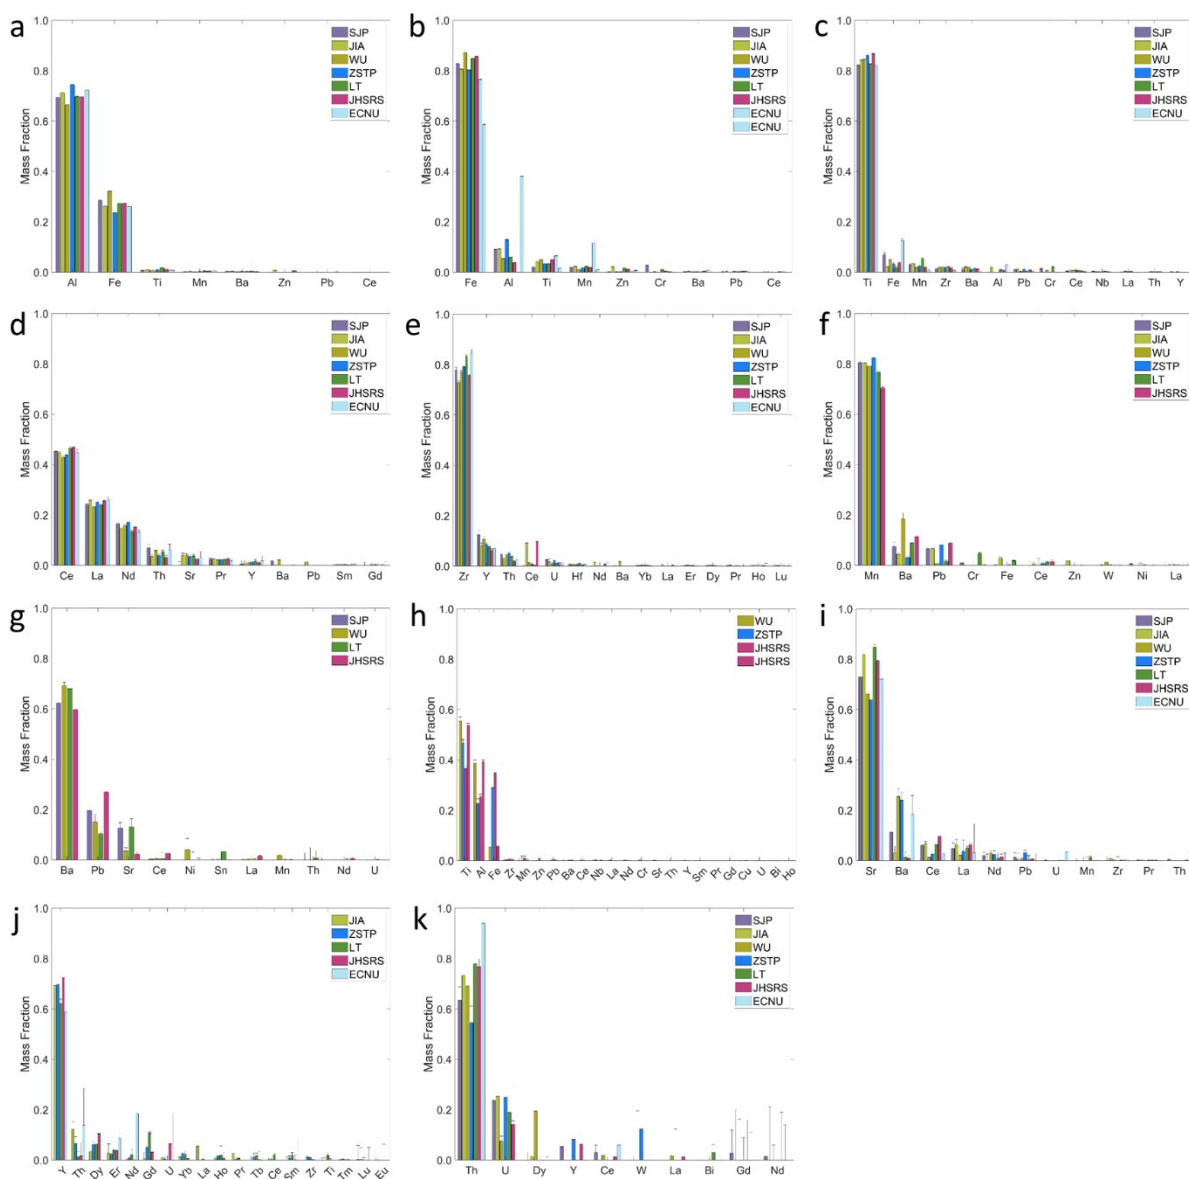

Fig. S6 Mean elemental mass composition of natural mmNP clusters identified in the dust samples (a) Al, (b) Fe, (c) Ti, (d) Ce, (e) Zr, (f) Mn, (g) Ba, (h) Ti, (i) Sr, (j) Y, and (k) Th-rich particles.

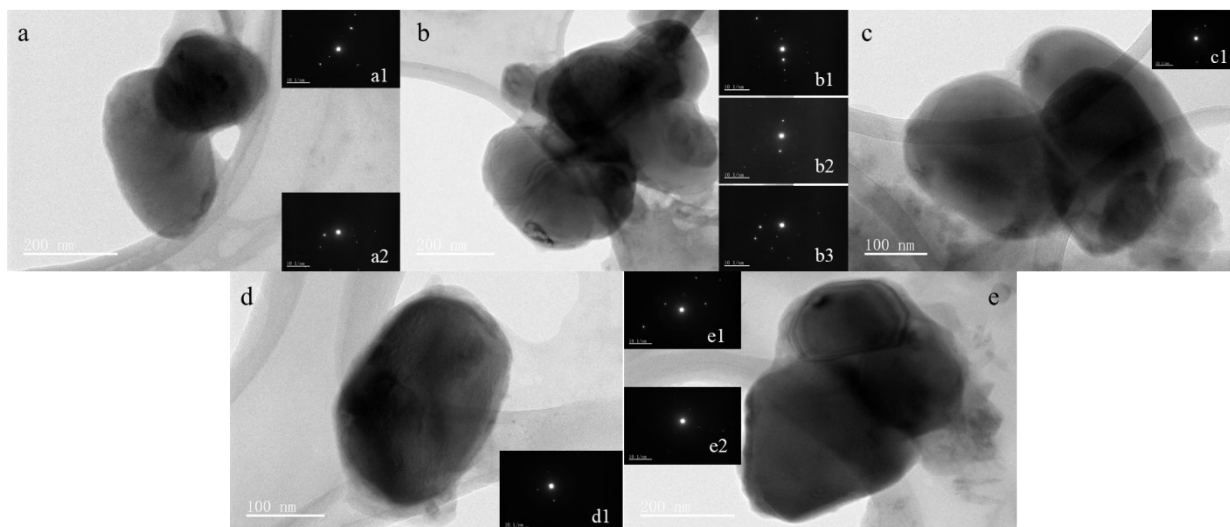

Fig. S7 Other Ti associated particles (a-d: anatase and rutile, e: Magnéli phase of titanium oxides) in dust samples.

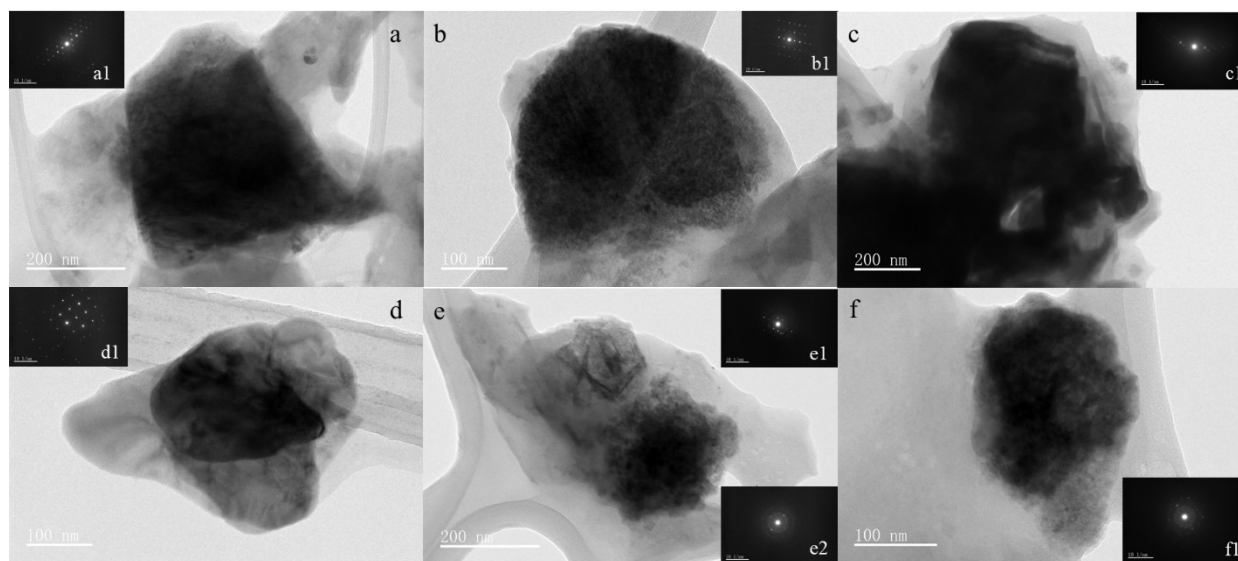

Fig. S8 Fe associated particles (a: ilmenite, b: hematite, c: pyrrhotite, d: magnetite, e: fayalite, f: Fe-Cr oxides) in dust samples, among which, d was found in JHSRS dust and the others were found in SJP dust.



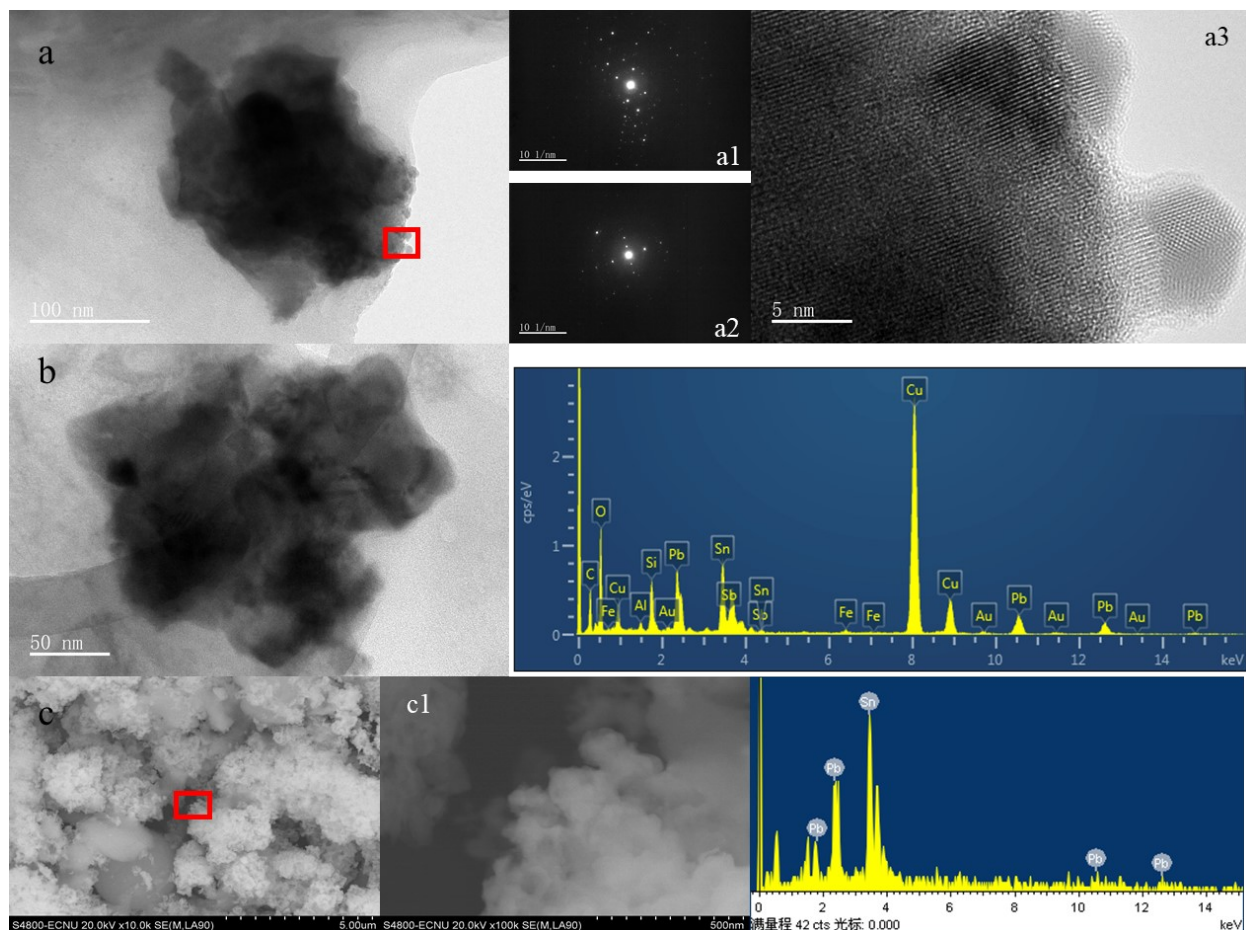

Fig. S9 Co-existence of Pb and Sn in particles of dust samples.

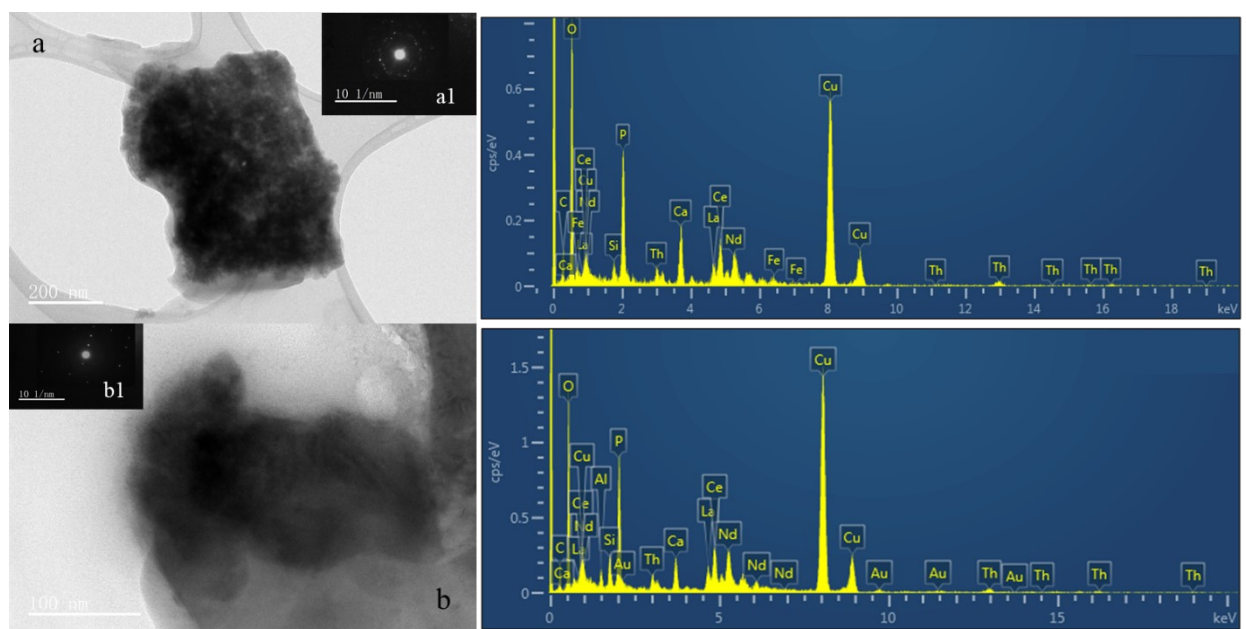

Fig. S10 TEM image shows the co-occurrence of Ce, La, Nd and Th in particles of dust samples.

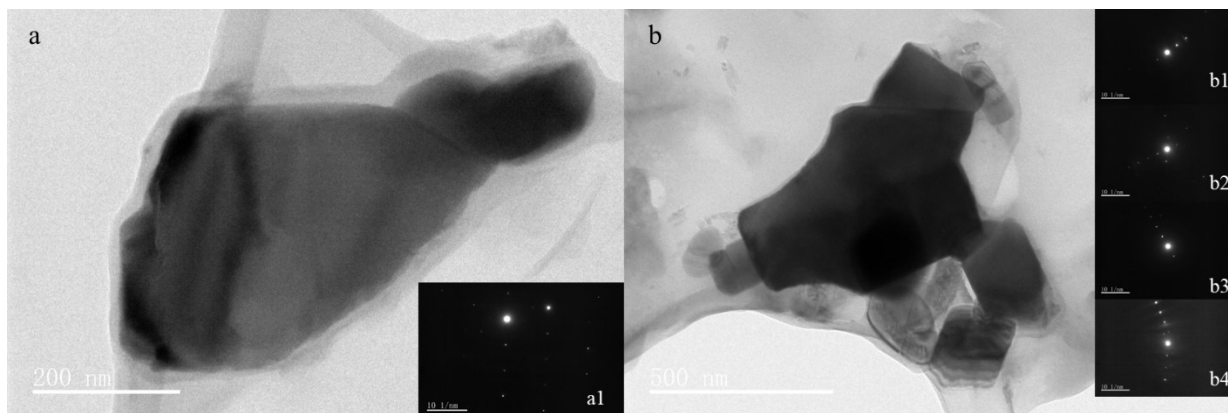

Fig. S11 Zn associated particles (a: zincite, b: aggregation of zincite and smithsonite) found in dust samples.

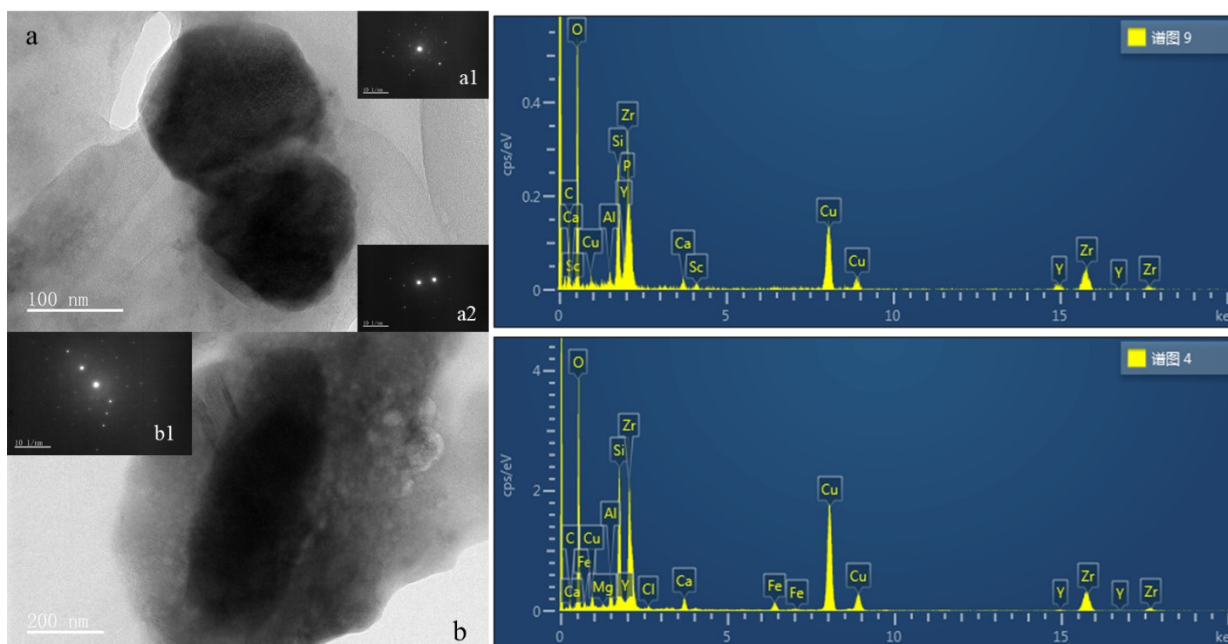

Fig. S12 Zr associated particles (a: Zr-Sc phosphate, b: baddeleyite) found in dust samples.

## Reference

1. A. Wang, S. Pan, Y. Zhang and Z. Liu, Modern sedimentation rate of the submarine delta of the Changjiang River, *Marine Geology & Quaternary Geology*, 2010, **30**, 1-6.
2. Q. Ran. Modern sedimentation rates of the Changjiang Subaqueous delta, *Nanjing University*, 2010.
3. R. Rudnick, S. Gao, H. Holland and K. Turekian, Composition of the continental crust, *The Crust*, 2003, **3**, 1-64.
